# Supplementary material for: Genomic and phenotypic profiling of Staphylococcus aureus isolates from bovine mastitis for antibiotic resistance and intestinal infectivity
Source: Springer Nature journal article supplement (doi:10.1186/s12866-023-02785-1), 2023-02-20

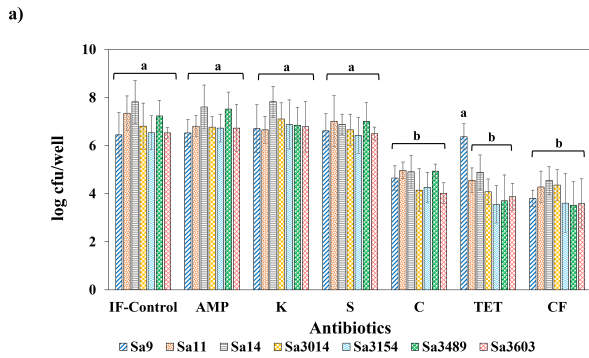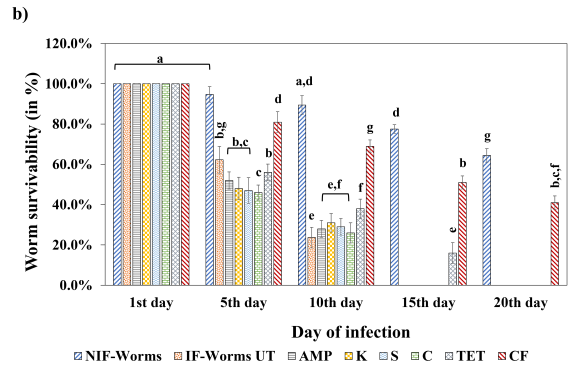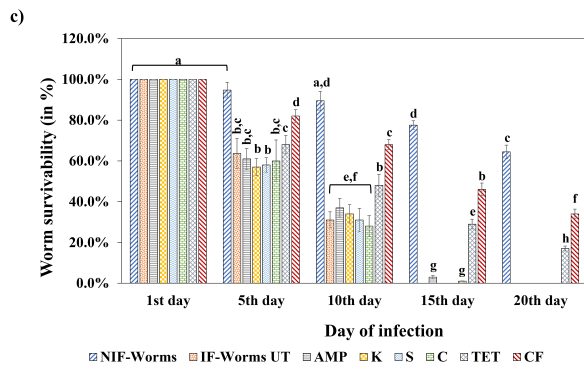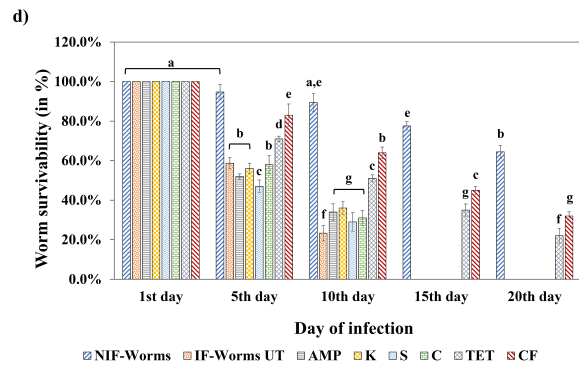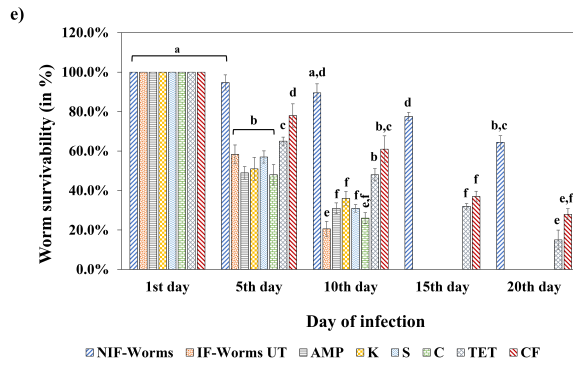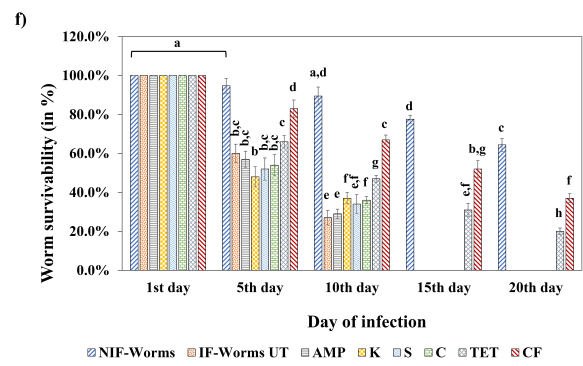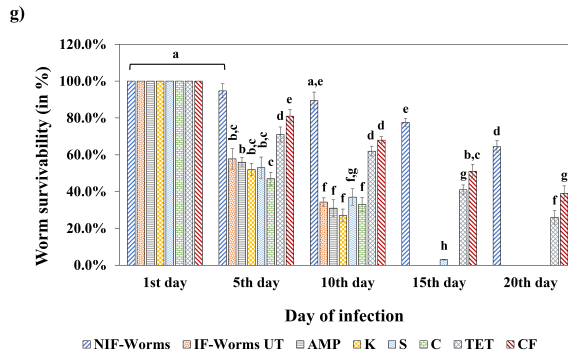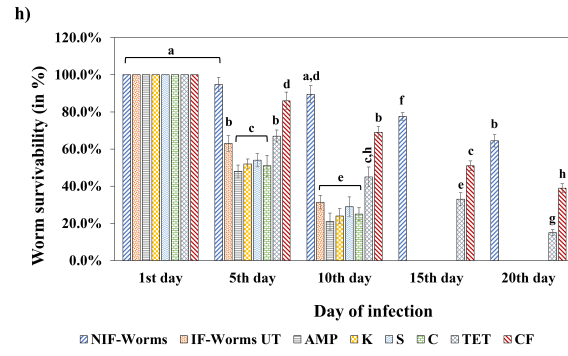

Supplement: MOESM1 [file 12866_2023_2785_MOESM1_ESM.pdf]
